# Supplementary material
Source: publisher figshare collection journal article supplement (https://acs.figshare.com/ndownloader/files/4190734)
Supplement: Supplementary file 1 [file 4190734]

# **Supporting information for:**

## **Effect of the $\text{TiO}_2$ reduction state on the catalytic CO oxidation on deposited size-selected Pt clusters**

Simon Bonanni, Kamel Aït-Mansour,\* Wolfgang Harbich, and Harald Brune\*

*Institute of Condensed Matter Physics, Ecole Polytechnique Fédérale de Lausanne (EPFL),  
CH-1015 Lausanne, Switzerland*

E-mail: harald.brune@epfl.ch; kamel.ait-mansour@epfl.ch

### **Details of the catalysis measurements**

Figure S1 shows the data measured on the Pt/LR- $\text{TiO}_2$  sample from which the  $\text{CO}_2$  production curves presented in Figure 2c of the manuscript have been derived. The  $\text{CO}_2$  signal exhibits peaks synchronized with the injections of the reactants (CO and  $\text{O}_2$ ). The inset shows one sequence of reactant and product pressure peaks. The  $\text{CO}_2$  peaks synchronized with the  $\text{O}_2$  pulses (blue) are labeled  $\text{CO}_2(\text{O}_2)$  and shown in orange and those synchronized with the CO pulses (green) are labeled  $\text{CO}_2(\text{CO})$  and shown in red. The maxima of the respective peaks are connected with full lines and displayed in Figure 2c. In Figure 6 of the manuscript we performed the reaction with a constant  $\text{O}_2$  pressure and CO pulses. In that case there is only one  $\text{CO}_2$  curve (red) which is obtained by connecting the  $\text{CO}_2$  peaks synchronized with the CO pulses. For further information, the reader can refer to S. Bonanni, et al., Eur. Phys. J. D 63, 241 (2011).

---

\*To whom correspondence should be addressed

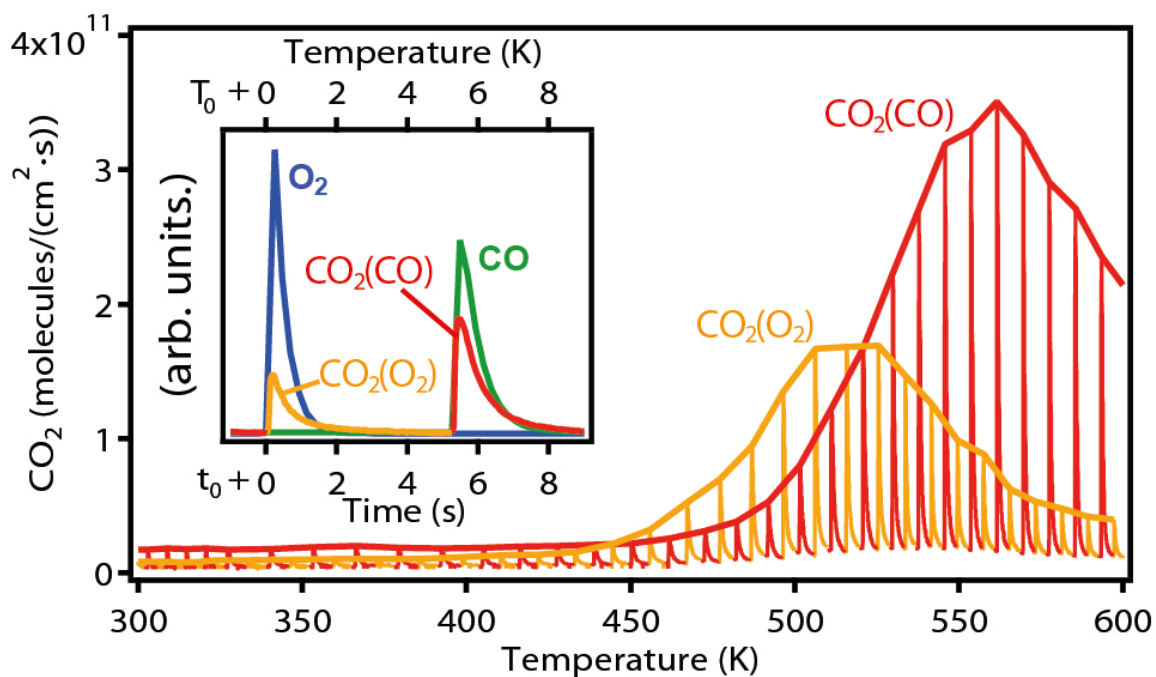

Figure S1: Inset: Single reactant pulse sequence, O<sub>2</sub> blue and CO green, and resulting CO<sub>2</sub> peaks, orange when correlated with O<sub>2</sub> pulse and red when synchronized with CO pulse. Main figure shows individual CO<sub>2</sub> pulses as function of temperature and time (ramp 1 K/s) and their respective peaks connected by curves, such as shown in Figure 2c of the main paper.

## Supplementary STM measurements

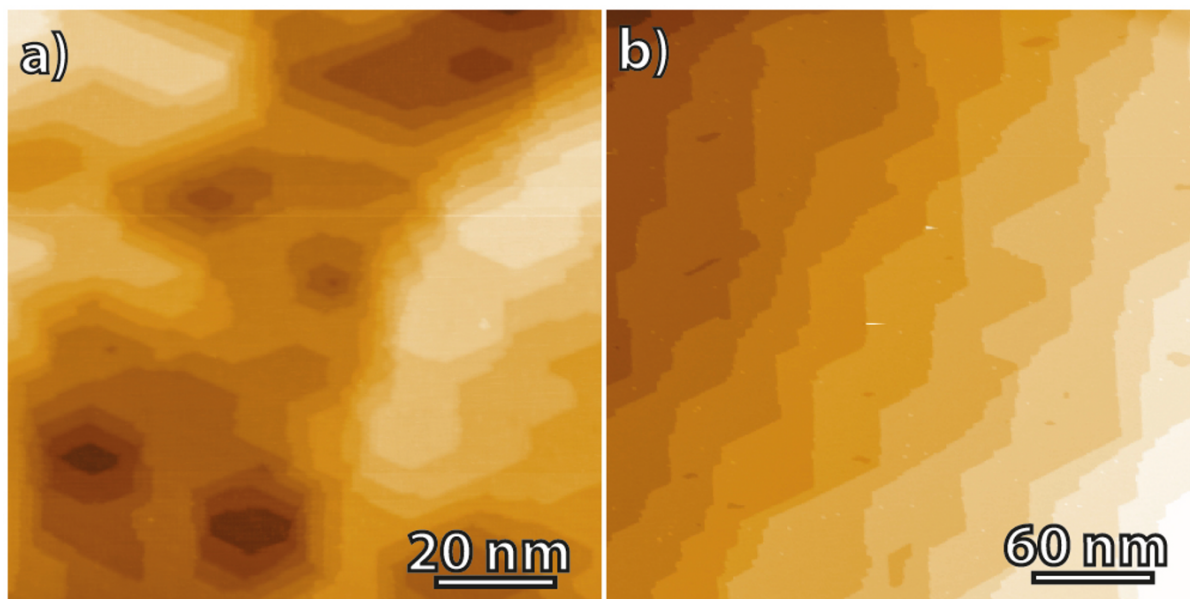

Figure S2: Large scale STM images of the clean (a) LR- and (b) HR-TiO<sub>2</sub>(110)-(1×1) surfaces showing terraces with an average width of 5 and 30 nm, respectively (+1.5V, 0.1 nA, 80 K).

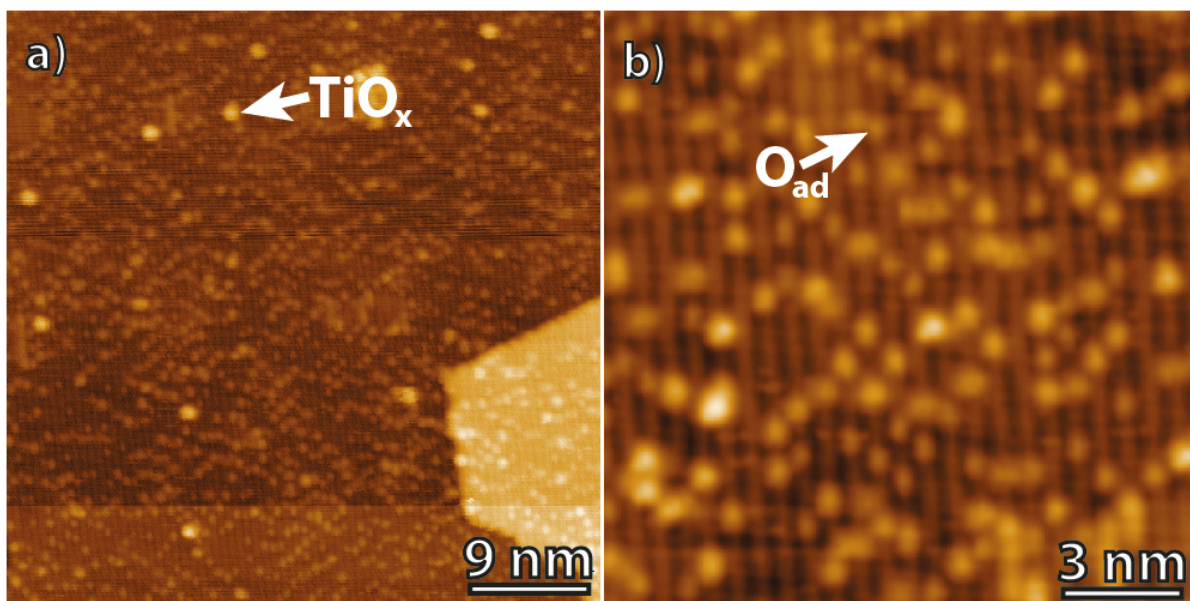

Figure S3: (a,b) Atomic resolution STM images of HR-TiO<sub>2</sub>(110)-(1×1) after oxygen exposure of 50 L at 100 K and annealing to 300 K (+1.5V, 0.1 nA, 80 K). The surface exhibits a coverage of 0.10 ML of oxygen adatoms (O<sub>ad</sub>) all of them adsorbed on the Ti rows. The features with the larger apparent height are attributed to TiO<sub>x</sub> nuclei.

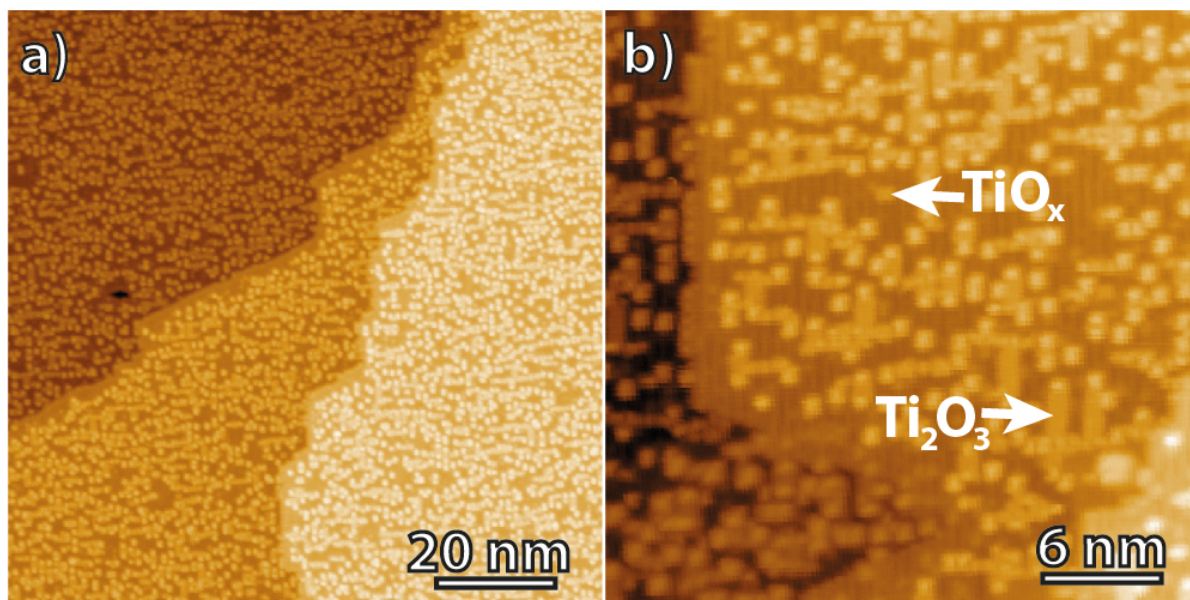

Figure S4: (a,b) STM images of HR-TiO<sub>2</sub>(110)-(1×1) after exposure to alternating CO and O<sub>2</sub> pulses while ramping the temperature from 300 K to 600 K identical to the CO oxidation experiments, however, without Pt clusters on the surface (+1.5V, 0.1 nA, 80 K). TiO<sub>x</sub> (including Ti<sub>2</sub>O<sub>3</sub>) structures analogue to those observed in the presence of Pt clusters (see Figure 3b of the main paper) are formed on the surface due to the reaction of Ti<sup>3+</sup> interstitials with the supplied oxygen.

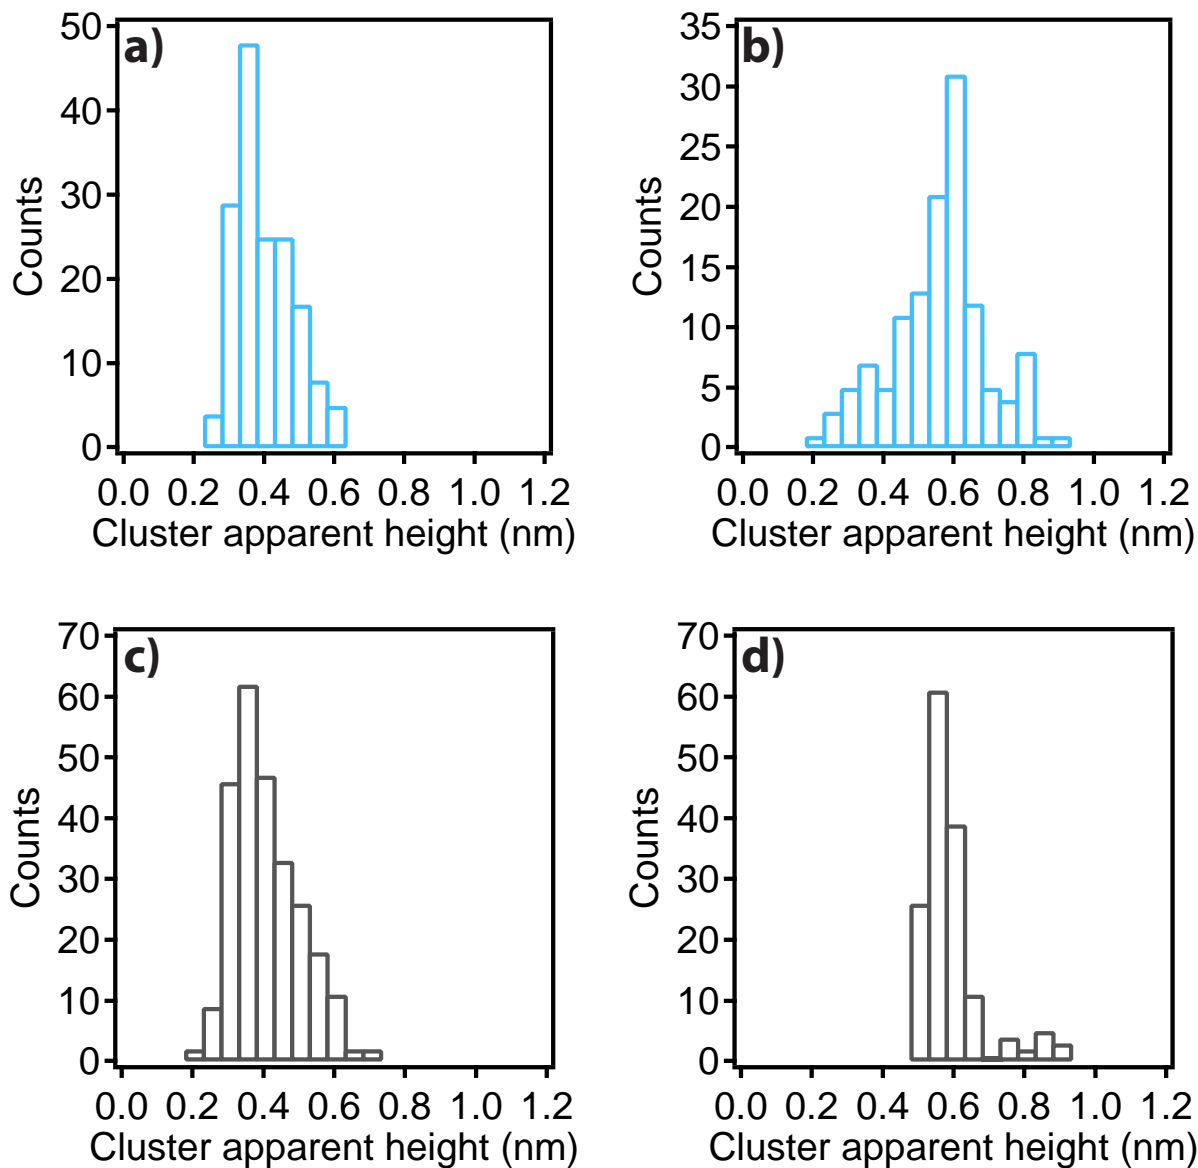

Figure S5: Cluster apparent height histograms before (a) and after (b) the catalytic activity measurement for the Pt/LR-TiO<sub>2</sub> sample and the corresponding histograms for the Pt/HR-TiO<sub>2</sub> sample (c,d). In (d) the clusters having an apparent height below 0.45 nm are not represented because they are hidden by TiO<sub>x</sub>.
